# Supplementary material for: Beetle assemblages in rainforest gaps along a subtropical to tropical latitudinal gradient
Source: Springer Nature journal article supplement (doi:10.1007/s10531-017-1326-8), 2017-02-28
Supplement: MOESM1 [file 12100194]

**Supplementary analysis**

*Vegetation and environmental variables*

Hemispherical photos were taken using a fish-eye lens from the centre point of each site at approximately 1m above the ground. The amount of canopy cover and light was estimated from the photos using the Gap Light Analyzer (GLA) imaging software developed by Simon Fraser University, Canada (1999). All photos were converted to a 100% shading threshold to standardise irregularities (clouds) for more accurate results ([Frazer et al. 1999](#_ENREF_20)). GLA imaging software was used to determine values for light transmission indices and solar radiation. The light index values are a total of direct and diffused light within each site.

At each site, the trunk diameter was measured at breast height (dbh) of all trees >1 cm to estimate the total basal area and to count the number of stems. Percentage coverage of woody debris coverage was estimated by taking the mean of four random 4 x 1 m² samples at each site.

We tested how light index values, basal area, number of stems and woody debris differed between gap and non-gap habitats, using two-way ANOVAs with gap versus non-gap differences and locations as factors.

The amount of light reaching the understorey was significantly higher and the mean number of stems greater than one cm in diameters at 1.3m in height was significantly lower in light gap sites compared with non-gap sites for all locations (Supporting Table 1, Supporting Fig. 1). There was, however, significant interaction effect in the mean number of stems (Table 1) as post-hoc pairwise comparisons suggested non-significant differences between light gap and non-gap habitats at Danum (Turkey’s HSD test adjusted *P* = 0.226). Basal area was significantly greater in non-gap habitats than light gap, whereas the opposite pattern was found in woody debris (Table 1, Supporting Fig. 1).

Supplementary Fig. 1 Measurements of a) light index, b) basal area of trees above 1.3m dbh, c) stem count of stems above 1.3m in dbh, d) percentage woody debris cover, e) percentage canopy cover and f) gap size in m2, in gaps and non gaps at 28oS (Lamington), 16oS (Daintree), and 5oN (Danum). Error bars are ±Standard Errors.


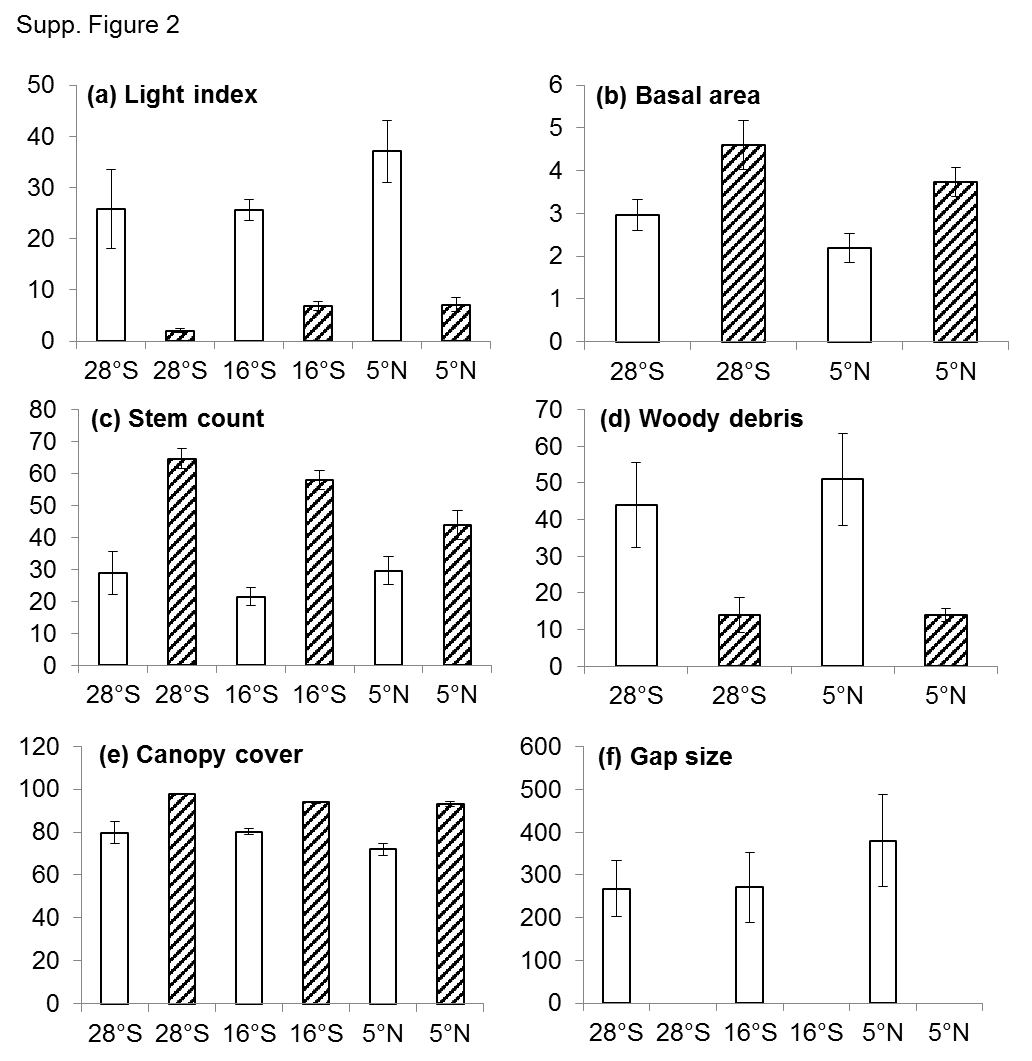


Supplementary. Fig. 2Coverage-based rarefaction and extrapolation curves based on beetle families from Lamington, Daintree, and Danum. Open and closed circles represent the sampling extent from gap and non-gap, respectively. Dashed lines are extrapolations by factor of 2 with 95% confidence intervals (grey area). Horizontal lines are drawn where coverage reaches 100% (1.0). q


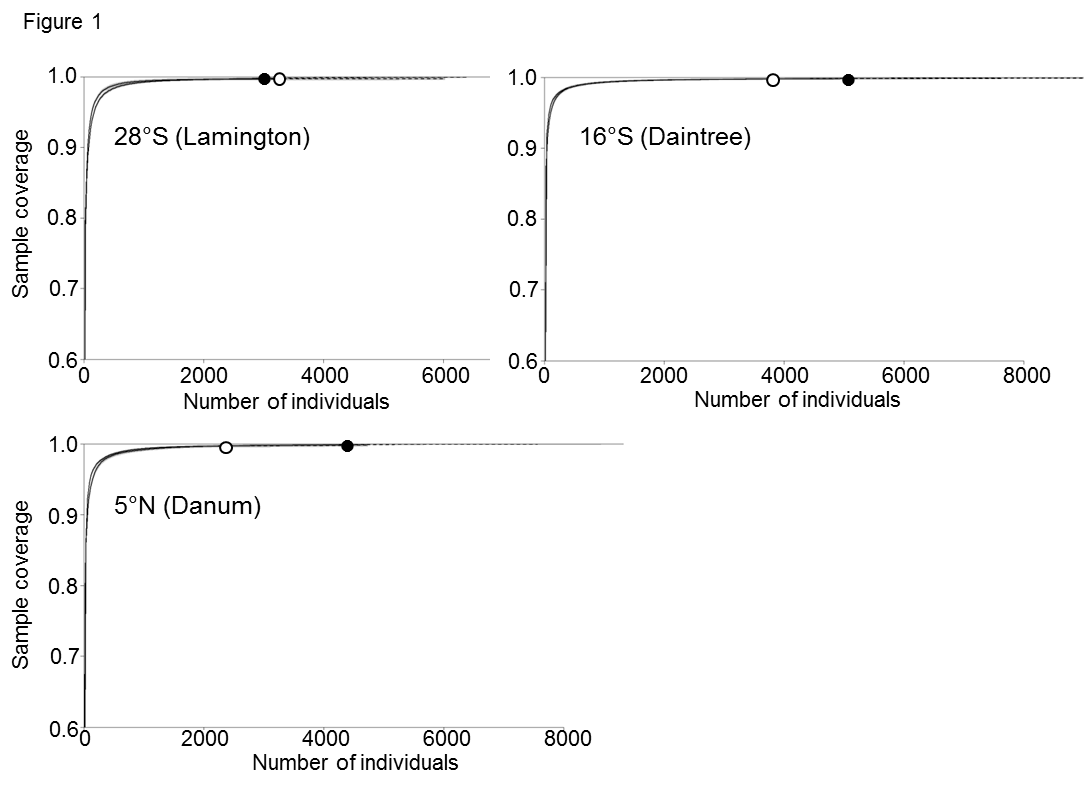


| Supporting Table 1. Summary of results of ANOVA based on light index, basal area, number of stems and woody debris, showing *F* and *P* values of the effects of gap vs non-gap treatments, location and their interactions. Significant *P* values are shown in bold. Degrees of freedom for habitat, location, their interaction and residuals are 1, 2, 2 and 24 (14 for basal area and woody debris where these were not measured at Daintree), respectively. | | | | | | | | |
| --- | --- | --- | --- | --- | --- | --- | --- | --- |
|  | Gap vs Non-gap | |  | Location | |  | Interaction | |
|  | *F* | *P* |  | *F* | *P* |  | *F* | *P* |
| Light index | 51.36 | **<0.001** |  | 2.08 | 0.146 |  | 0.93 | 0.410 |
| Basal area | 14.42 | **<0.001** |  | 3.81 | 0.069 |  | 0.01 | 0.910 |
| Number of stems | 61.24 | **<0.001** |  | 2.62 | 0.094 |  | 4.01 | **0.032** |
| Woody debris | 14.07 | **0.002** |  | 0.15 | 0.700 |  | 0.15 | 0.700 |

Supplementary Table 2. Summary of the number of beetles in different families collected across five light gap and five non-gaps sites in rainforest at each of three locations. For each family Sum is the total number of beetles, Mean is the mean percentage of beetles across the traps and SE is the standard error of the mean. Note for a few families one or two subfamilies with distinctive feeding habit have been separated out and hence the abundance for the family exclude those of the separated subfamilies.

|  |  | 28oS Lamington | | | | | | 16oS Daintree | | | | | | 5oN Danum | | | | | |
| --- | --- | --- | --- | --- | --- | --- | --- | --- | --- | --- | --- | --- | --- | --- | --- | --- | --- | --- | --- |
| Family | Feeding Guild | Light Gap | | | Non-Gap | | | Light Gap | | | Non-Gap | | | Light Gap | | | Non-Gap | | |
| Sum | Mean | SE | Sum | Mean | SE | Sum | Mean | SE | Sum | Mean | SE | Sum | Mean | SE | Sum | Mean | SE |
| Aderidae | S | 1 | 0.2 | 0.2 | 0 | 0.0 | 0.0 | 1 | 0.2 | 0.2 | 2 | 0.4 | 0.2 | 0 | 0.0 | 0.0 | 0 | 0.0 | 0.0 |
| Anthicidae | S | 0 | 0.0 | 0.0 | 0 | 0.0 | 0.0 | 0 | 0.0 | 0.0 | 0 | 0.0 | 0.0 | 0 | 0.0 | 0.0 | 14 | 2.8 | 0.9 |
| Anthribidae | F | 2 | 0.4 | 0.2 | 1 | 0.2 | 0.2 | 0 | 0.0 | 0.0 | 0 | 0.0 | 0.0 | 3 | 0.2 | 0.2 | 0 | 0.0 | 0.0 |
| Bolboceratidae | F | 4 | 0.8 | 0.4 | 9 | 1.8 | 0.8 | 1 | 0.2 | 0.2 | 5 | 1.0 | 0.4 | 18 | 0.6 | 2.7 | 2 | 0.4 | 0.2 |
| Biphyllidae | S | 1 | 0.2 | 0.2 | 1 | 0.2 | 0.2 | 0 | 0.0 | 0.0 | 2 | 0.4 | 0.2 | 0 | 0.0 | 0.0 | 0 | 0.0 | 0.0 |
| Brentidae | X | 2 | 0.4 | 0.4 | 0 | 0.0 | 0.0 | 7 | 1.4 | 1.4 | 1 | 0.2 | 0.2 | 3 | 0.0 | 0.2 | 0 | 0.0 | 0.0 |
| Buprestidae | X | 1 | 0.2 | 0.2 | 0 | 0.0 | 0.0 | 0 | 0.0 | 0.0 | 0 | 0.0 | 0.0 | 0 | 0.0 | 0.0 | 0 | 0.0 | 0.0 |
| Callirhipidae | X | 0 | 0.0 | 0.0 | 0 | 0.0 | 0.0 | 2 | 0.4 | 0.2 | 1 | 0.2 | 0.2 | 1 | 0.0 | 0.2 | 2 | 0.4 | 0.4 |
| Cantharidae | P | 6 | 1.2 | 0.8 | 0 | 0.0 | 0.0 | 0 | 0.0 | 0.0 | 0 | 0.0 | 0.0 | 0 | 0.0 | 0.0 | 2 | 0.4 | 0.2 |
| Carabidae | P | 56 | 11.2 | 2.9 | 27 | 5.4 | 1.0 | 29 | 5.8 | 1.7 | 18 | 3.6 | 0.8 | 37 | 1.4 | 2.7 | 19 | 3.8 | 2.6 |
| Cerylonidae | F | 2 | 0.4 | 0.4 | 0 | 0.0 | 0.0 | 1 | 0.2 | 0.2 | 4 | 0.8 | 0.4 | 17 | 0.8 | 1.3 | 2 | 0.4 | 0.2 |
| Chyrsomelidae | H | 23 | 4.6 | 1.3 | 4 | 0.8 | 0.6 | 7 | 1.4 | 0.2 | 1 | 0.2 | 0.2 | 34 | 1.2 | 1.7 | 67 | 13.4 | 5.0 |
| Cleridae | P | 15 | 3.0 | 2.0 | 1 | 0.2 | 0.2 | 0 | 0.0 | 0.0 | 1 | 0.2 | 0.2 | 4 | 0.2 | 0.6 | 1 | 0.2 | 0.2 |
| Coccinellidae | P | 1 | 0.2 | 0.2 | 7 | 1.4 | 0.5 | 1 | 0.2 | 0.2 | 0 | 0.0 | 0.0 | 0 | 0.0 | 0.0 | 0 | 0.0 | 0.0 |
| Corylophidae | F | 59 | 11.8 | 4.6 | 27 | 5.4 | 1.4 | 78 | 15.6 | 3.1 | 101 | 20.2 | 6.2 | 3 | 0.2 | 0.2 | 5 | 1.0 | 1.0 |
| Cryptophagidae | F | 38 | 7.6 | 4.1 | 61 | 12.2 | 7.8 | 0 | 0.0 | 0.0 | 0 | 0.0 | 0.0 | 0 | 0.0 | 0.0 | 0 | 0.0 | 0.0 |
| Cucujidae | F | 6 | 1.2 | 0.5 | 1 | 0.2 | 0.2 | 1 | 0.2 | 0.2 | 1 | 0.2 | 0.2 | 0 | 0.0 | 0.0 | 1 | 0.2 | 0.2 |
| Curculionidae Platypodinae | X | 86 | 17.2 | 9.3 | 7 | 1.4 | 0.2 | 9 | 1.8 | 1.1 | 4 | 0.8 | 0.4 | 88 | 2.8 | 7.6 | 195 | 39.0 | 10.9 |
| Curculionidae Scolytinae | X | 12 | 2.4 | 1.4 | 12 | 2.4 | 1.5 | 70 | 14.0 | 6.3 | 33 | 6.6 | 3.1 | 1333 | 44.0 | 45.9 | 2388 | 477.6 | 215.5 |
| Curculionidae other | H | 54 | 10.8 | 1.7 | 31 | 6.2 | 1.8 | 7 | 1.4 | 0.2 | 16 | 3.2 | 1.8 | 28 | 0.8 | 3.0 | 10 | 2.0 | 1.1 |
| Dermestidae | S | 35 | 7.0 | 4.6 | 0 | 0.0 | 0.0 | 0 | 0.0 | 0.0 | 2 | 0.4 | 0.4 | 0 | 0.0 | 0.0 | 0 | 0.0 | 0.0 |
| Discolomatidae | F | 11 | 2.2 | 0.6 | 25 | 5.0 | 3.8 | 0 | 0.0 | 0.0 | 0 | 0.0 | 0.0 | 0 | 0.0 | 0.0 | 0 | 0.0 | 0.0 |
| Dryopidae | S | 0 | 0.0 | 0.0 | 0 | 0.0 | 0.0 | 0 | 0.0 | 0.0 | 0 | 0.0 | 0.0 | 1 | 0.0 | 0.2 | 0 | 0.0 | 0.0 |
| Dytiscidae | P | 0 | 0.0 | 0.0 | 0 | 0.0 | 0.0 | 3 | 0.6 | 0.6 | 0 | 0.0 | 0.0 | 0 | 0.0 | 0.0 | 6 | 1.2 | 0.7 |
| Elateridae | H | 56 | 11.2 | 3.8 | 30 | 6.0 | 2.7 | 9 | 1.8 | 1.0 | 1 | 0.2 | 0.2 | 14 | 0.2 | 2.3 | 19 | 3.8 | 0.7 |
| Endomychidae | F | 0 | 0.0 | 0.0 | 0 | 0.0 | 0.0 | 2 | 0.4 | 0.2 | 0 | 0.0 | 0.0 | 3 | 0.2 | 0.2 | 9 | 1.8 | 1.1 |
| Erotylidae | F | 0 | 0.0 | 0.0 | 1 | 0.2 | 0.2 | 0 | 0.0 | 0.0 | 0 | 0.0 | 0.0 | 0 | 0.0 | 0.0 | 0 | 0.0 | 0.0 |
| Eucnemidae | F | 1 | 0.2 | 0.2 | 0 | 0.0 | 0.0 | 1 | 0.2 | 0.2 | 3 | 0.6 | 0.4 | 2 | 0.0 | 0.4 | 0 | 0.0 | 0.0 |
| Gyrinidae | P | 0 | 0.0 | 0.0 | 0 | 0.0 | 0.0 | 0 | 0.0 | 0.0 | 0 | 0.0 | 0.0 | 0 | 0.0 | 0.0 | 1 | 0.2 | 0.2 |
| Histeridae | P | 14 | 2.8 | 1.8 | 3 | 0.6 | 0.2 | 44 | 8.8 | 2.1 | 42 | 8.4 | 3.7 | 16 | 0.4 | 2.5 | 14 | 2.8 | 0.9 |
| Hybosoridae | S | 0 | 0.0 | 0.0 | 0 | 0.0 | 0.0 | 0 | 0.0 | 0.0 | 0 | 0.0 | 0.0 | 21 | 0.6 | 1.5 | 255 | 51.0 | 12.1 |
| Hydraenidae | H | 1 | 0.2 | 0.2 | 2 | 0.4 | 0.2 | 41 | 8.2 | 2.5 | 7 | 1.4 | 1.2 | 0 | 0.0 | 0.0 | 0 | 0.0 | 0.0 |
| Hydrophilidae | P | 138 | 27.6 | 21.6 | 244 | 48.8 | 18.7 | 26 | 5.2 | 2.0 | 14 | 2.8 | 2.0 | 34 | 0.2 | 3.6 | 35 | 7.0 | 2.6 |
| Laemophilidae | F | 23 | 4.6 | 1.5 | 53 | 10.6 | 3.3 | 0 | 0.0 | 0.0 | 0 | 0.0 | 0.0 | 0 | 0.0 | 0.0 | 0 | 0.0 | 0.0 |
| Lathridiidae | F | 23 | 4.6 | 1.2 | 13 | 2.6 | 0.9 | 2 | 0.4 | 0.2 | 5 | 1.0 | 0.4 | 1 | 0.0 | 0.2 | 0 | 0.0 | 0.0 |
| Leiodidae | F | 52 | 10.4 | 3.6 | 147 | 29.4 | 10.6 | 8 | 1.6 | 0.7 | 211 | 42.2 | 33.2 | 3 | 0.0 | 0.2 | 15 | 3.0 | 1.4 |
| Lycidae | P | 2 | 0.4 | 0.2 | 1 | 0.2 | 0.2 | 0 | 0.0 | 0.0 | 0 | 0.0 | 0.0 | 2 | 0.0 | 0.2 | 7 | 1.4 | 1.4 |
| Lymexylidae | X | 0 | 0.0 | 0.0 | 0 | 0.0 | 0.0 | 0 | 0.0 | 0.0 | 0 | 0.0 | 0.0 | 0 | 0.0 | 0.0 | 1 | 0.2 | 0.2 |
| Melyridae | P | 7 | 1.4 | 1.2 | 1 | 0.2 | 0.2 | 0 | 0.0 | 0.0 | 0 | 0.0 | 0.0 | 0 | 0.0 | 0.0 | 12 | 2.4 | 1.5 |
| Monotomidae | F | 0 | 0.0 | 0.0 | 0 | 0.0 | 0.0 | 1 | 0.2 | 0.2 | 1 | 0.2 | 0.2 | 4 | 0.2 | 0.4 | 0 | 0.0 | 0.0 |
| Mordellidae | H | 15 | 3.0 | 0.9 | 4 | 0.8 | 0.4 | 0 | 0.0 | 0.0 | 0 | 0.0 | 0.0 | 0 | 0.0 | 0.0 | 1 | 0.2 | 0.2 |
| Nitidulidae | F | 14 | 2.8 | 1.0 | 65 | 13.0 | 7.3 | 12 | 2.4 | 1.0 | 30 | 6.0 | 2.5 | 102 | 0.8 | 14.0 | 65 | 13.0 | 6.1 |
| Passalidae | X | 0 | 0.0 | 0.0 | 0 | 0.0 | 0.0 | 0 | 0.0 | 0.0 | 0 | 0.0 | 0.0 | 1 | 0.0 | 0.2 | 0 | 0.0 | 0.0 |
| Phalacridae | H | 49 | 9.8 | 3.6 | 76 | 15.2 | 3.7 | 23 | 4.6 | 1.6 | 10 | 2.0 | 2.0 | 13 | 0.4 | 0.8 | 13 | 2.6 | 1.3 |
| Phengodidae | P | 0 | 0.0 | 0.0 | 0 | 0.0 | 0.0 | 0 | 0.0 | 0.0 | 0 | 0.0 | 0.0 | 0 | 0.0 | 0.0 | 6 | 1.2 | 1.2 |
| Propalticidae | F | 2 | 0.4 | 0.4 | 0 | 0.0 | 0.0 | 0 | 0.0 | 0.0 | 0 | 0.0 | 0.0 | 4 | 0.0 | 0.8 | 0 | 0.0 | 0.0 |
| Ptiliidae | S | 845 | 169.0 | 20.5 | 701 | 140.2 | 41.6 | 1525 | 305.0 | 65.1 | 2182 | 436.4 | 159.8 | 120 | 2.4 | 5.8 | 202 | 40.4 | 16.9 |
| Rhipiphoridae | P | 0 | 0.0 | 0.0 | 0 | 0.0 | 0.0 | 0 | 0.0 | 0.0 | 0 | 0.0 | 0.0 | 0 | 0.0 | 0.0 | 2 | 0.4 | 0.2 |
| Salpingidae | F | 6 | 1.2 | 0.4 | 5 | 1.0 | 0.3 | 0 | 0.0 | 0.0 | 0 | 0.0 | 0.0 | 0 | 0.0 | 0.0 | 0 | 0.0 | 0.0 |
| Scarabaeidae Scarabaeinae | S | 3 | 0.6 | 0.4 | 31 | 6.2 | 2.6 | 4 | 0.8 | 0.5 | 10 | 2.0 | 0.5 | 9 | 0.2 | 0.7 | 178 | 35.6 | 6.8 |
| Scarabaeidae other | S | 11 | 2.2 | 0.7 | 18 | 3.6 | 1.5 | 2 | 0.4 | 0.2 | 1 | 0.2 | 0.2 | 5 | 0.4 | 0.3 | 21 | 4.2 | 0.7 |
| Scraptiidae | X | 2 | 0.4 | 0.2 | 0 | 0.0 | 0.0 | 0 | 0.0 | 0.0 | 1 | 0.2 | 0.2 | 0 | 0.0 | 0.0 | 0 | 0.0 | 0.0 |
| Silvanidae | F | 4 | 0.8 | 0.4 | 13 | 2.6 | 2.6 | 1 | 0.2 | 0.2 | 0 | 0.0 | 0.0 | 1 | 0.0 | 0.2 | 0 | 0.0 | 0.0 |
| Sphindidae | F | 0 | 0.0 | 0.0 | 0 | 0.0 | 0.0 | 5 | 1.0 | 1.0 | 0 | 0.0 | 0.0 | 1 | 0.0 | 0.2 | 0 | 0.0 | 0.0 |
| Staphylinidae Pselaphinae | P | 473 | 94.6 | 51.0 | 177 | 35.4 | 14.0 | 75 | 15.0 | 2.7 | 79 | 15.8 | 3.3 | 30 | 1.4 | 1.1 | 86 | 17.2 | 6.6 |
| Staphylinidae Scaphidiidae | F | 18 | 3.6 | 1.4 | 13 | 2.6 | 1.5 | 28 | 5.6 | 2.7 | 10 | 2.0 | 1.0 | 5 | 0.4 | 0.6 | 2 | 0.4 | 0.2 |
| Staphylinidae Scydmaeninae | P | 170 | 34.0 | 18.0 | 118 | 23.6 | 5.8 | 138 | 27.6 | 11.3 | 128 | 25.6 | 13.7 | 14 | 0.6 | 1.2 | 104 | 20.8 | 6.9 |
| Staphylinidae other | P | 849 | 169.8 | 29.9 | 1084 | 216.8 | 22.6 | 1468 | 293.6 | 40.5 | 2140 | 428.0 | 169.6 | 389 | 15.4 | 9.9 | 640 | 128.0 | 26.1 |
| Tenebrionidae | S | 7 | 1.4 | 0.6 | 1 | 0.2 | 0.2 | 173 | 34.6 | 19.2 | 4 | 0.8 | 0.5 | 3 | 0.0 | 0.4 | 0 | 0.0 | 0.0 |
| Ulodidae | F | 0 | 0.0 | 0.0 | 1 | 0.2 | 0.2 | 0 | 0.0 | 0.0 | 0 | 0.0 | 0.0 | 0 | 0.0 | 0.0 | 0 | 0.0 | 0.0 |
| Zopheridae | F | 0 | 0.0 | 0.0 | 0 | 0.0 | 0.0 | 0 | 0.0 | 0.0 | 0 | 0.0 | 0.0 | 1 | 0.0 | 0.2 | 2 | 0.4 | 0.4 |
| Total/Mean/SE |  | **3200** | 640.0 | 126.8 | **3016** | 603.2 | 102.0 | **3805** | 761.0 | 132.1 | **5071** | 1014.2 | 340.3 | **2368** | 76.0 | 66.5 | **4404** | 880.8 | 251.9 |
